# Supplementary material for: Validation of Questionnaire Methods to Quantify Recreational Water Ingestion
Source: MDPI journal article supplement (doi:10.3390/ijerph15112435), 2018-11-01
Supplement: s1 [file s1]

## Supplementary Materials

Table 1: Question and answer choices presented to participants. Non-multiple choice questions are followed by bracketed response instructions.

| Question and response options                                                                                                                                                                                                                                                                                                                                                                                                                                                                                                  |
|--------------------------------------------------------------------------------------------------------------------------------------------------------------------------------------------------------------------------------------------------------------------------------------------------------------------------------------------------------------------------------------------------------------------------------------------------------------------------------------------------------------------------------|
| What is your sex? [Fill in]                                                                                                                                                                                                                                                                                                                                                                                                                                                                                                    |
| What is your age? [Fill in]                                                                                                                                                                                                                                                                                                                                                                                                                                                                                                    |
| List your weight in pounds [Fill in]                                                                                                                                                                                                                                                                                                                                                                                                                                                                                           |
| List your height in feet and inches [Fill in]                                                                                                                                                                                                                                                                                                                                                                                                                                                                                  |
| List your race [Fill in]                                                                                                                                                                                                                                                                                                                                                                                                                                                                                                       |
| List your ethnicity [Fill in]                                                                                                                                                                                                                                                                                                                                                                                                                                                                                                  |
| Select the type(s) of pool(s) you swam in for this study [Select all that apply] <ol style="list-style-type: none"> <li>1. Wading pool</li> <li>2. Spa</li> <li>3. Wave pool</li> <li>4. Flume</li> <li>5. Therapy pool</li> <li>6. Other</li> </ol>                                                                                                                                                                                                                                                                           |
| Was the pool indoor or outdoor? [Select yes, no]                                                                                                                                                                                                                                                                                                                                                                                                                                                                               |
| How much time did you spend swimming at the pool (min)? [Fill in]                                                                                                                                                                                                                                                                                                                                                                                                                                                              |
| Did you submerge your body at the pool? [Select yes, no]                                                                                                                                                                                                                                                                                                                                                                                                                                                                       |
| How long did you swim in the pool (min) [Fill in]                                                                                                                                                                                                                                                                                                                                                                                                                                                                              |
| Select all activities you engaged in at the pool [Select all that apply] <ol style="list-style-type: none"> <li>1. Splashing</li> <li>2. Standing</li> <li>3. Swimming in the deep end</li> <li>4. Swim lessons</li> <li>5. Lap swimming (competitive)</li> <li>6. Lap swimming (non-competitive)</li> <li>7. Used a fountain or other pool play feature</li> <li>8. Used a waterslide</li> <li>9. Diving</li> <li>10. Water aerobics</li> <li>11. A water sport other than competitive swimming</li> <li>12. Other</li> </ol> |
| How long did you engage in each activity listed in the previous question (min)? [Fill in]                                                                                                                                                                                                                                                                                                                                                                                                                                      |
| When you swam in the deep end, how many times did you swim near the pool                                                                                                                                                                                                                                                                                                                                                                                                                                                       |

|                                                                                                                                                                                                                                                                                                                              |
|------------------------------------------------------------------------------------------------------------------------------------------------------------------------------------------------------------------------------------------------------------------------------------------------------------------------------|
| bottom? [Fill in]                                                                                                                                                                                                                                                                                                            |
| Did you wear goggles at any point during the swim? [Select yes, no]                                                                                                                                                                                                                                                          |
| Did you get water up your nose? [Select yes, no]                                                                                                                                                                                                                                                                             |
| What is your swimming skill level? [Select one] <ol style="list-style-type: none"> <li>1. Beginner</li> <li>2. Moderate</li> <li>3. Advanced</li> </ol>                                                                                                                                                                      |
| During the swim, did you use any of the following swim aids? [Select all that apply] <ol style="list-style-type: none"> <li>1. Lifejacket</li> <li>2. Kickboard</li> <li>3. Arm floats</li> <li>4. Other swim aid</li> </ol>                                                                                                 |
| Are you toilet trained? [Select yes, no]                                                                                                                                                                                                                                                                                     |
| Did you consume any food at the pool? [Select yes, no]                                                                                                                                                                                                                                                                       |
| Did you drink from a drinking fountain at the pool? [Select yes, no]                                                                                                                                                                                                                                                         |
| Did you use the restroom at the pool? [Select yes, no]                                                                                                                                                                                                                                                                       |
| Did you change a diaper at the pool? [Select yes, no]                                                                                                                                                                                                                                                                        |
| If you changed a diaper at the pool, where did you change the diaper? [Fill in]                                                                                                                                                                                                                                              |
| Did you smell chlorine at the pool? [Select yes, no]                                                                                                                                                                                                                                                                         |
| If you smelled chlorine at the pool, how strong was the chlorine smell? [Select one] <ol style="list-style-type: none"> <li>1. Weak (barely noticeable)</li> <li>2. Noticeable, but not strong</li> <li>3. Strong</li> </ol>                                                                                                 |
| Did you shower before entering the pool? [Select yes, no]                                                                                                                                                                                                                                                                    |
| If you showered before entering the pool, how long was the shower (min)? [Fill in]                                                                                                                                                                                                                                           |
| Have you swam at any pool in the past [select all that apply] <ol style="list-style-type: none"> <li>1. Two weeks</li> <li>2. Four days</li> <li>3. Three days</li> <li>4. Two days</li> <li>5. Day</li> </ol>                                                                                                               |
| How much water did you swallowed while swimming (estimate)? [Select one] <ol style="list-style-type: none"> <li>1. No water or only a few drops</li> <li>2. 1 to 2 mouthfuls (amount in a shot glass)</li> <li>3. 3 to 5 mouthfuls (amount in a coffee cup)</li> <li>4. 6 to 8 mouthfuls (amount in a soda glass)</li> </ol> |
| What was your age when you visited a pool for the first time (years)? [Fill in]                                                                                                                                                                                                                                              |
| On average, how much time do you spend at any pool per visit (hours)? [Fill in]                                                                                                                                                                                                                                              |

|                                                                                                                                                                                                                                                                                                                                                                                                                                                                                                                                                                                                                                                                                                                                                                                                                                                                                                                                                                                                                                                                          |
|--------------------------------------------------------------------------------------------------------------------------------------------------------------------------------------------------------------------------------------------------------------------------------------------------------------------------------------------------------------------------------------------------------------------------------------------------------------------------------------------------------------------------------------------------------------------------------------------------------------------------------------------------------------------------------------------------------------------------------------------------------------------------------------------------------------------------------------------------------------------------------------------------------------------------------------------------------------------------------------------------------------------------------------------------------------------------|
| On average, how many times in one year do you visit any pool facility? [Fill in]                                                                                                                                                                                                                                                                                                                                                                                                                                                                                                                                                                                                                                                                                                                                                                                                                                                                                                                                                                                         |
| <p>Are you currently experiencing any of the following respiratory, eye or ear irritation symptoms? [Select all that apply]</p> <ol style="list-style-type: none"> <li>1. Coughing</li> <li>2. Wheezing</li> <li>3. Chest tightness</li> <li>4. Shortness of breath</li> <li>5. Frequent sneezing</li> <li>6. Itchy, runny nose</li> <li>7. Sore throat</li> <li>8. Backache</li> <li>9. Eye irritation or stinging</li> <li>10. Watery eyes</li> <li>11. Halo vision (halos around lights)</li> <li>12. Blurry or foggy vision</li> <li>13. Blue-gray vision</li> <li>14. Ear infection</li> </ol>                                                                                                                                                                                                                                                                                                                                                                                                                                                                      |
| <p>Other exposures and health conditions [Select all that apply]</p> <ol style="list-style-type: none"> <li>1. Smoker (occasional and regular)</li> <li>2. Ex-smoker</li> <li>3. Doctor diagnosed asthma</li> <li>4. Wheezing that limits daily activities</li> <li>5. Hay fever</li> <li>6. Non-drug allergies (other than hay fever)</li> <li>7. Chronic Obstructive Pulmonary Disease (COPD)</li> <li>8. Chronic bronchitis (cough and phlegm for at least months a year)</li> <li>9. Cystic fibrosis</li> <li>10. Sinusitis (a cold that has not improved after ~7 days of coughing, fatigue, fever, headache, sore throat, or nasal congestion)</li> <li>11. Flu (combination of fever, cough, muscle/body aches, sore throat, fatigue, runny/stuffy nose lasting 24 hours to ~7 days)</li> <li>12. Diarrhea anytime in the past 2 weeks (14 days)</li> <li>13. Crohn's Disease</li> <li>14. Irritable Bowel Syndrome</li> <li>15. Ulcerative colitis</li> <li>16. Partial removal of stomach or intestines</li> <li>17. HIV/AIDS</li> <li>18. Hepatitis</li> </ol> |

19. Eczema or atopic dermatitis

If you selected diarrhea as a health condition, has the diarrhea resulted in 3 or more loose stools in the past 24-hours? [Select yes, no]

If you selected diarrhea as a health condition, has the diarrhea impaired your daily activities (remained at home or in bed)? [Select yes, no]
